# Supplementary material
Source: Springer Nature journal article supplement (https://www.springermedizin.de/resource/supplementary/12981_2006_43_MOESM3_ESM.pdf/9603702)
Supplement: MOESM3 [file 9603702]

SIV antibodies in plasma (titers)

Group A

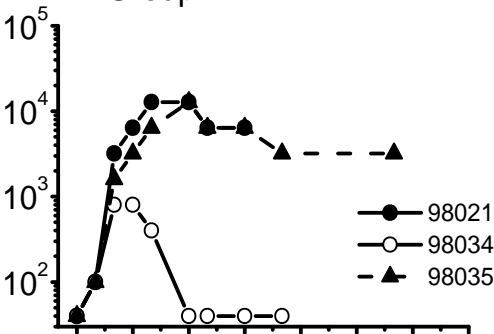

Group C

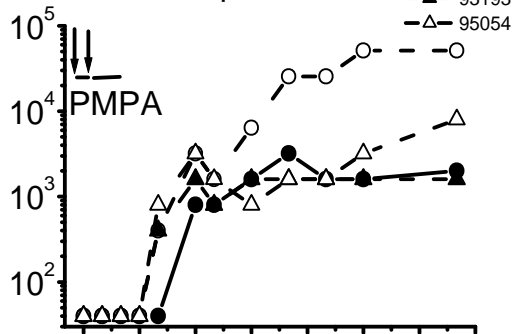

Group B

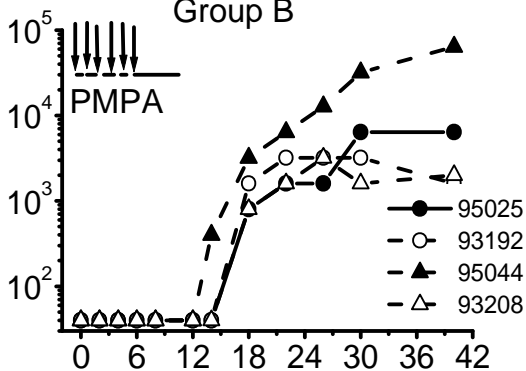

Group D

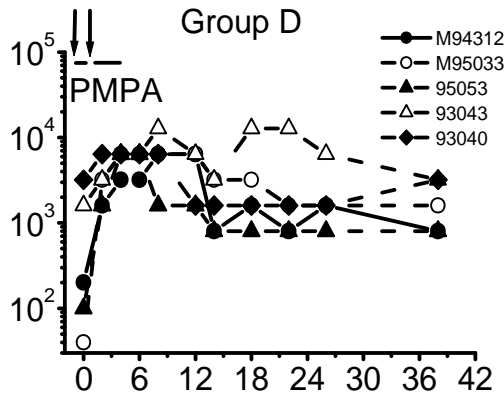

Weeks after SIV<sub>mne</sub> inoculation
